# Supplementary material for: Palladium nanospheres-embedded metal–organic frameworks to enhance the ECL efficiency of 2,6-dimethyl-8-(3-carboxyphenyl)4,4′-difluoroboradiazene in aqueous solution for ultrasensitive Cu2+ detection
Source: Royal Society of Chemistry journal article supplement (doi:10.1039/d3an01729j), 2023-12-15
Supplement: d3an01729j1.pdf [file d3an01729j1.pdf]

## Supporting Information

### **Palladium nanospheres embedded metal–organic frameworks to enhance the ECL efficiency of 2,6-dimethyl-8-(3- carboxyphenyl)4,4'-difluoroboradiazene in aqueous solution for ultrasensitive Cu<sup>2+</sup> detection**

Shu-Shu Song, Jia-Le Zhan, Hao-Tian Zhu, Jing-Yi Bao, Ai-Jun Wang, Pei-Xin Yuan\*,  
Jiu-Ju Feng\*

*Key laboratory of the Ministry of Education for Advanced Catalysis Materials, College  
of Chemistry and Materials Science, College of Geography and Environmental  
Sciences, Zhejiang Normal University, Jinhua 321004, China*

*\*Corresponding authors: ypxdr@zjnu.edu.cn (P.X. Yuan); jjfeng@zjnu.cn (J.J. Feng).*

## **Experimental**

### **1. Reagents and materials**

Herein, 2,4-dimethylpyrrole, 4-formylbenzoic acid, acetonitrile (ACN), tetrabutylammonium perchlorate (TBAP), methyl alcohol, trifluoroacetic acid (TFA), dichlorodicyanobenzoquinone (AR), triethylamine (TEA), boron trifluoride diethyl etherate (AR), ethyl acetate (AR), methyl alcohol (AR), palladium chloride (PdCl<sub>2</sub>), 1,2,4,5-benzenetetramine (BTA), sodium borohydride (NaBH<sub>4</sub>), aqueous ammonia (NH<sub>3</sub>·H<sub>2</sub>O), 5,5-dimethyl-1-pyrroline N-oxide (DMPO), 2,2,6,6-tetramethyl-4-piperidinol (TMP), p-benzoquinone, NaOH, MgSO<sub>4</sub>, and K<sub>2</sub>S<sub>2</sub>O<sub>8</sub> were obtained from Aladdin Biochemical Technology Co., Ltd. (Shanghai, China). Phosphate buffer solution (PBS, pH 7.40, 0.10 M KH<sub>2</sub>PO<sub>4</sub>/Na<sub>2</sub>HPO<sub>4</sub>) was prepared with ultrapure water, which was obtained from a Millipore water purification system (≥18 MΩ, Milli-Q, Millipore) and used throughout all of the assays.

### **2. Apparatus**

The morphology and structure of the samples were characterized by scanning electron microscopy (SEM) with a Hitachi S-4800 scanning electron microanalyzer. Transmission electron microscopy (TEM) and high-resolution transmission electron microscopy (HR-TEM) measurements were taken on a JEM-2100F microscope operating at an acceleration voltage of 200 kV. X-ray photoelectron spectroscopy (XPS) analysis was performed on a Thermo VG ESCALAB 250 spectrometer with an Al Kα X-ray irradiation (1486.6 eV) for excitation operated at 120 W, and the data were calibrated by the binding energy of C 1s. Fluorescence (FL) measurements were

conducted with an RF-6000 spectrometer (Thermo Fisher Scientific, America). ECL plots were taken with a home-made ECL spectroscopy acquiring system (consisting of an Acton SP2300i monochromator) equipped with a liquid N<sub>2</sub> cooled PyLoN 400BR-eXcelon digital CCD detector (Princeton Instruments, USA) and a VersaSTAT 3 electrochemical analyzer (Princeton Applied Research, USA). NMR hydrogen spectroscopy (<sup>1</sup>H-NMR) measurement was conducted with a Bruker AMX-500 spectrometer at 600 MHz (Bruker., Germany), by employing tetramethylsilane (TMS) as the reference and deuterated acetone (C<sub>3</sub>D<sub>6</sub>O) as the solvent. The sample compositions were examined by liquid chromatography/mass spectrometry (LC/MS, 6230 TOF, Agilent Technologicine Co., Ltd., USA) with the mobile phase (mainly containing methanol and water). Electron paramagnetic resonance (EPR) measurements were conducted on a Bruker EPR EMX plus -9.5/12 by applying a continuous excited potential of 1.50 V.

A classical three-electrode system was used in the electrochemical experiments, in which a glassy carbon electrode (GCE,  $\Phi = 5\text{mm}$ ) acted as the working electrode, an Ag/AgCl electrode (saturated KCl) as the reference electrode and a platinum wire as the counter electrode. Electrochemistry and ECL experiments were performed at CHI 660D electrochemical workstation (Chenhua Analytical Instrument Co., Ltd., China) and MPI-E multi-function ECL analyzer (Xi'an Remax Analytical Instrument Co., Ltd., China), respectively. Electrochemical impedance spectra (EIS) were recorded in a 0.1 M KCl solution containing 5 mM K<sub>3</sub>[Fe(CN)<sub>6</sub>]/K<sub>4</sub>[Fe(CN)<sub>6</sub>] by using an alternating voltage of 10 mV in a frequency range of 0.1 ~ 100,000 Hz.

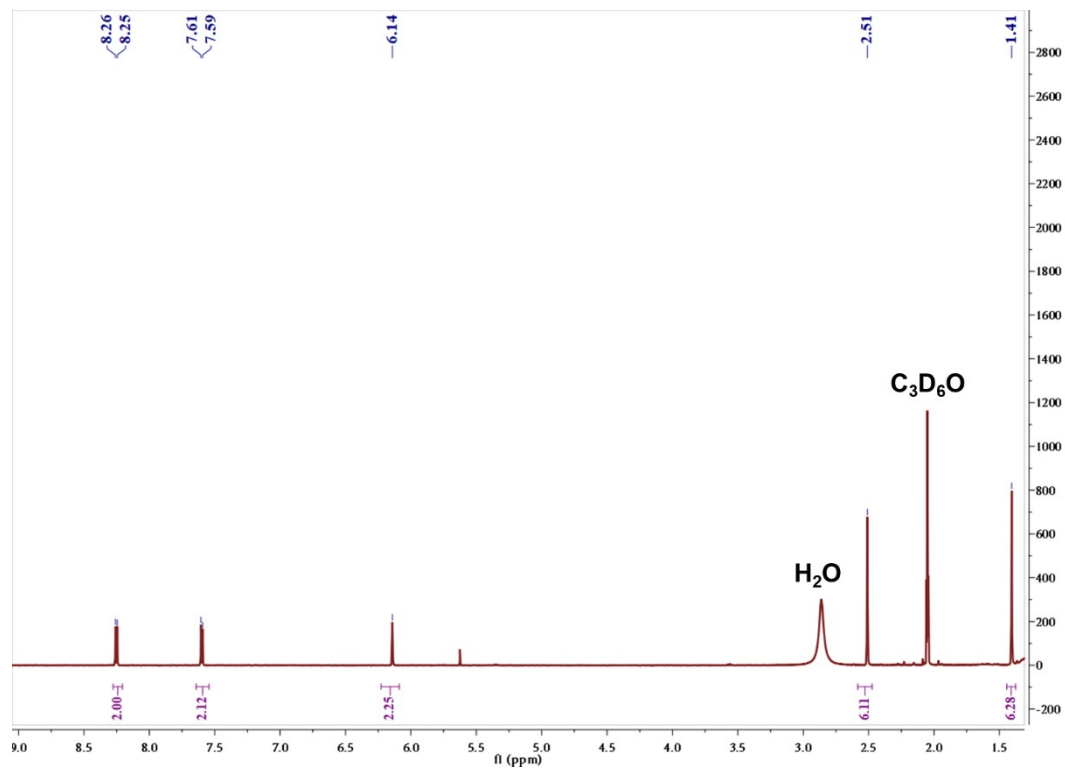

**Figure S1.** The  $^1\text{H}$  NMR plot of BET.

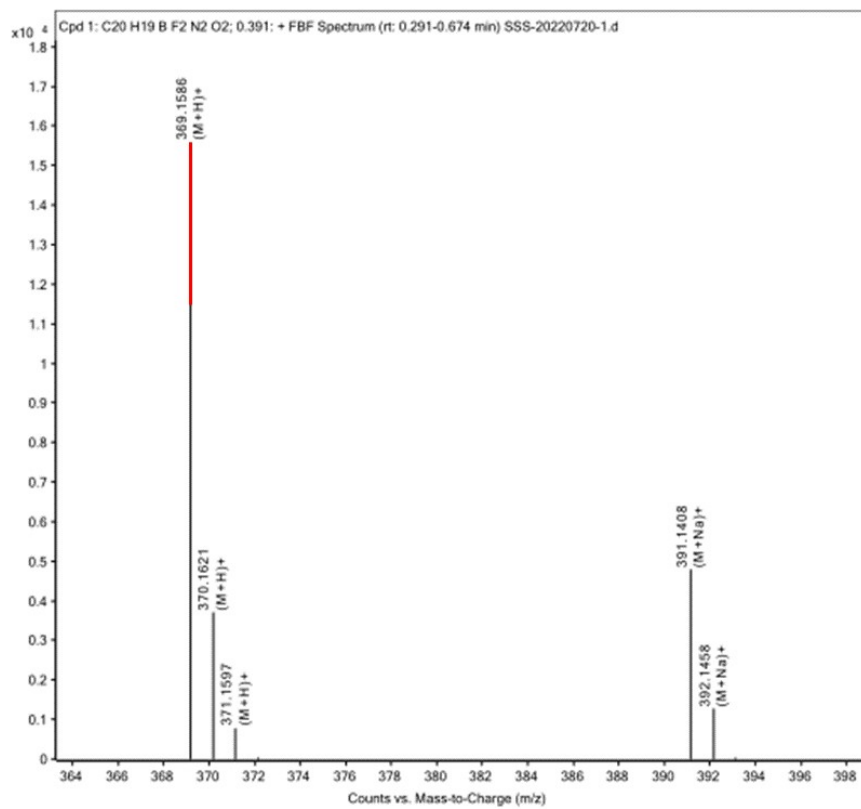

**Figure S2.** The LC/MS plot of BET.

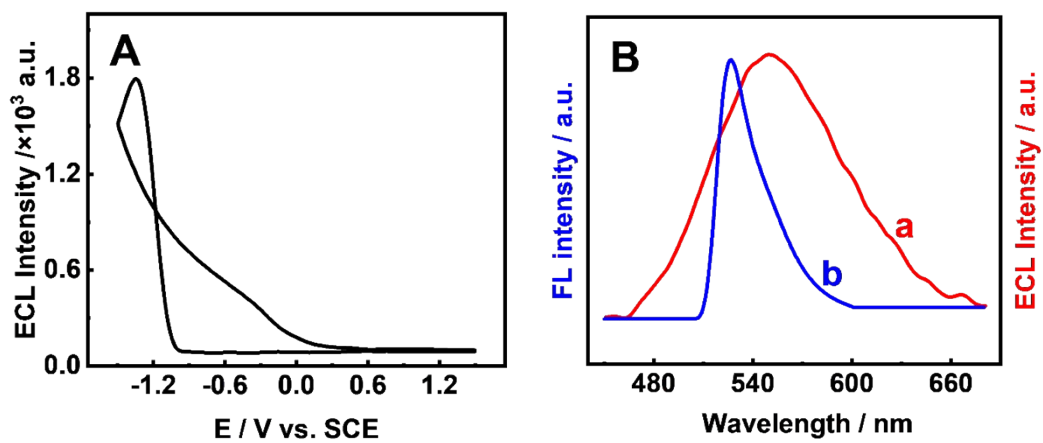

**Figure S3.** (A) The ECL plot of BET acquired with 2 mM p-benzoquinone. (B) The corresponding ECL plot (curve a) and FL spectrum (curve b) of BET.

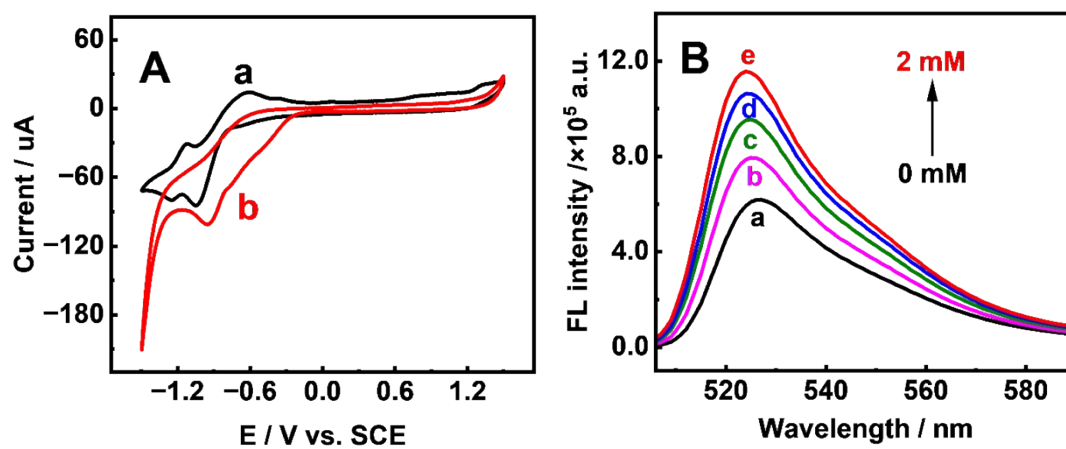

**Figure S4.** The (A) CV plots of BET (curve a) and BET + 2 mM acetic acid (curve b). The (B) FL spectra of BET (curve a) and BET + acetic acid (0.5-2.0 mM, curves b-e).

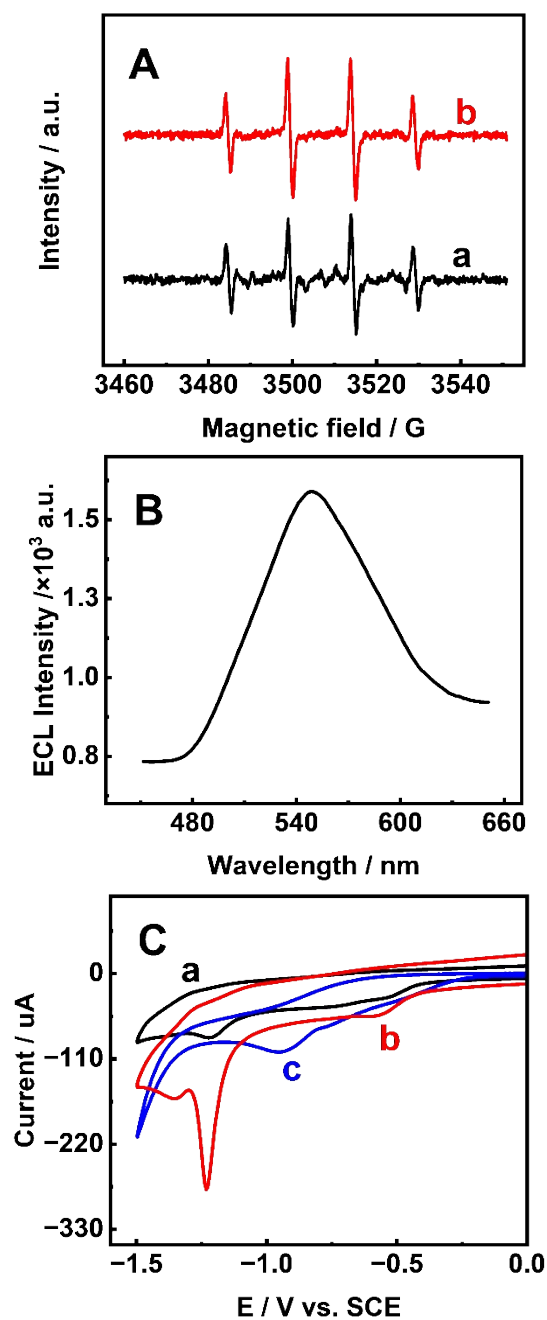

**Figure S5.** (A) The EPR plots recorded in the 2 mM  $K_2S_2O_8$  solution without (curve a) and with acetic acid (curve b). (B) The ECL spectrum of the BET/GCE + 2 mM  $K_2S_2O_8$ . (C) The CV plots of the BET/GCE (curve a), BET/Pd@MOFs/GCE (curve b) and BET/Pd@MOFs/GCE + 10 mM  $Cu^{2+}$  (curve c) acquired in the PBS with 2 mM  $K_2S_2O_8$ .



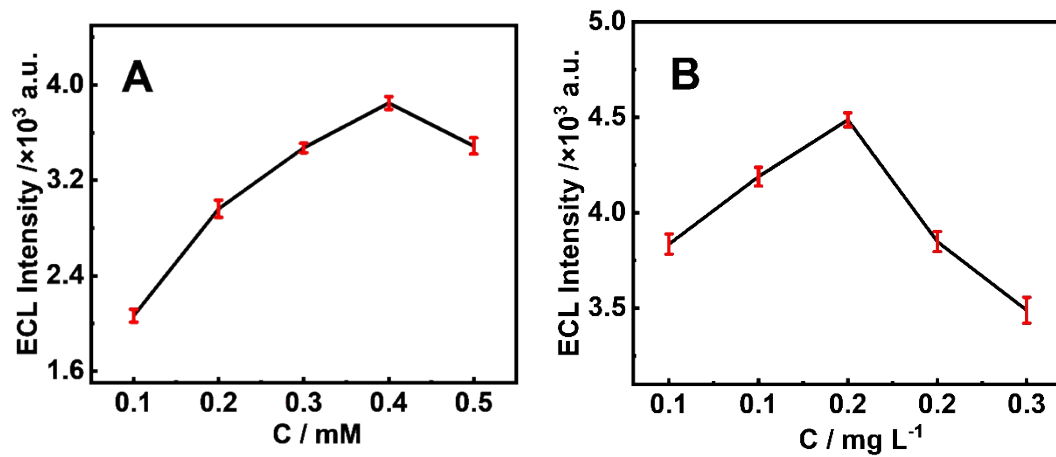

**Figure S6.** The influences of the concentrations of the BET (A) and Pd@MOFs (B) on the ECL signals.

**Table S1.** Comparison of the analytical performances of different Cu<sup>2+</sup> detection assays.

| <b>Method</b> | <b>Linear Range</b>       | <b>LOD</b>     | <b>Reference</b> |
|---------------|---------------------------|----------------|------------------|
| FL            | 0.10 $\mu$ M–5.00 $\mu$ M | 5.61 nM        | 1                |
| EC            | 50.00 nM–12.00 $\mu$ M    | 13.00 nM       | 2                |
| PEC           | 1.00 nM–10.0 $\mu$ M      | 0.40 nM        | 3                |
| ECL           | 0.20 nM–1.00 $\mu$ M      | 0.07 nM        | 4                |
| ECL           | 1.0 pM–500.0 nM           | 0.33 pM        | 5                |
| <b>ECL</b>    | <b>1.0 pM-100.0 pM</b>    | <b>0.12 pM</b> | <b>This work</b> |

| Sample     | Added (pM) | Found (pM)        | Recovery (%) | RSD (%) |
|------------|------------|-------------------|--------------|---------|
| Lake water | 1.0        | 1.03 1.02 1.02    | 102.4        | 0.53    |
|            | 10.0       | 9.93 9.98 10.02   | 99.8         | 4.08    |
|            | 100.0      | 100.2 100.0 100.1 | 100.1        | 1.97    |

**Table S2.** Detection of Cu<sup>2+</sup> in the Chuyang lake water sample.

## References

1. J. Hou, P. Jia, K. Yang, T. Bu, S. Zhao, L. Li and L. Wang, *ACS Appl. Mater. Interfaces*, 2022, **14**, 13848–13857.
2. F. F. Wang, C. Liu, J. Yang, H. L. Xu, W. Y. Pei and J. F. Ma, *Chem. Eng. J.*, 2022, **438**, 135639.
3. J. Li, F. Mo, L. Guo, J. Huang, Z. Lu, Q. Xu and H. Li, *Sens. Actuators B Chem.*, 2020, **328**, 129032.
4. J. Chen, Q. Wang, X. Liu, X. Chen, L. Wang and W. Yang, *Chem. Commun.*, 2020, **56**, 4680-4683.
5. Q. Han, C. Wang, Z. Li, J. Wu, P. K. Liu, F. Mo and Y. Fu, *Anal. Chem.*, 2020, **92**, 3324–3331.
